# Supplementary material for: Oxidative transformation of thiol groups to disulfide bonds in mesoporous silicas: a diagnostic reaction for probing distribution of organic functional groups
Source: Royal Society of Chemistry journal article supplement (doi:10.1039/b9nj00389d), 2009-01-01
Supplement: b9nj00389d.pdf [file b9nj00389d.pdf]

## **Electronic supplementary information (ESI)**

**Oxidative transformation of thiol groups to disulfide bonds in mesoporous silicas:**

**A diagnostic reaction for probing distribution of organic functional groups**

Hsien-Ming Kao,<sup>\*</sup> Po-Jui Chiu, Guang-Liang Jheng, Chia-Chun Kao, Chung-Ta Tsai,

Shueh-Lin Yau, Hui-Hsu Gavin Tsai,<sup>\*</sup> and Yi-Kang Chou

*Department of Chemistry, National Central University, Chung-Li, Taiwan 32054,*

*R.O.C.*

**Density Functional Calculations.**<sup>1</sup> The B3LYP density functional, Becke's three-parameter exchange functional,<sup>2</sup> and Lee–Yang–Parr gradient-corrected correlation functional<sup>3</sup> with moderate-sized 6-31G(d,p) basis set<sup>4</sup> were utilized to calculate the optimized structure of the  $T^3-(Q^4)_n-T^3$  motifs ( $n = 0-3$ ) in which each peripheral Si atom was capped and saturated with hydrogen atoms.

## References

- (1) M. J. Frisch, G. W. Trucks, H. B. Schlegel, G. E. Scuseria, M. A. Robb, J. R. Cheeseman, V. G. Zakrzewski, J. A. Montgomery, R. E. Stratmann, J. C. Burant, S. Dapprich, J. M. Millam, A. D. Daniels, K. N. Kudin, M. C. Strain, O. Farkas, J. Tomasi, V. Barone, M. Cossi, R. Cammi, B. Mennucci, C. Pomelli, C. Adamo, S. Clifford, J. Ochterski, G. A. Petersson, P. Y. Ayala, Q. Cui, K. Morokuma, P. Salvador, J. J. Dannenberg, D. K. Malick, A. D. Rabuck, K. Raghavachari, J. B. Foresman, J. V. B. Ortiz, Q. Cui, A. G. Baboul, S. Clifford, B. B. Stefanov, G. Liu,; A. Liashenko, P. Piskorz,; I. Komaromi, R. Gomperts, R. L. Martin, D. J. Fox, T. Keith, M. A. Al-Laham, C. Y. Peng, A. Nanayakkara, M. Challacombe, P. M. W. Gill, B. G. Johnson, W. Chen, M. W. Wong, J. L. Andres, C. Gonzalez, M. Head-Gordon, E. S. Replogle and J. A. Pople, Gaussian 03, Revision D.02; Gaussian, Inc. Wallingford CT, 2004.
- (2) A. D. Becke, *J. Chem. Phys.*, 1993, **98**, 5648.
- (3) C. Lee, W. Yang and R. G. Parr, *Phys. Rev. B*, 1988, **37**, 785.
- (4) G. A. Petersson and M. A. Al-Laham, *J. Chem. Phys.*, 1991, **94**, 6081.

**Table S1.** Textural properties of the adsorbents studied.

|          | Surface area<br>(cm <sup>2</sup> /g) | Pore volume<br>(cm <sup>3</sup> /g) | Pore size<br>(nm) |
|----------|--------------------------------------|-------------------------------------|-------------------|
| S1-0.06  | 800                                  | 0.44                                | 3.0               |
| S1-0.2   | 710 <sup>a</sup>                     | 0.32 <sup>a</sup>                   | 2.5               |
| S15-0.14 | 560                                  | 0.66                                | 4.6               |
| M-0.14   | 240                                  | 0.26                                | 3.6               |

<sup>a</sup>This sample contains a surface area of 350 cm<sup>2</sup>/g and a pore volume of 0.19 cm<sup>3</sup>/g due to micropores.

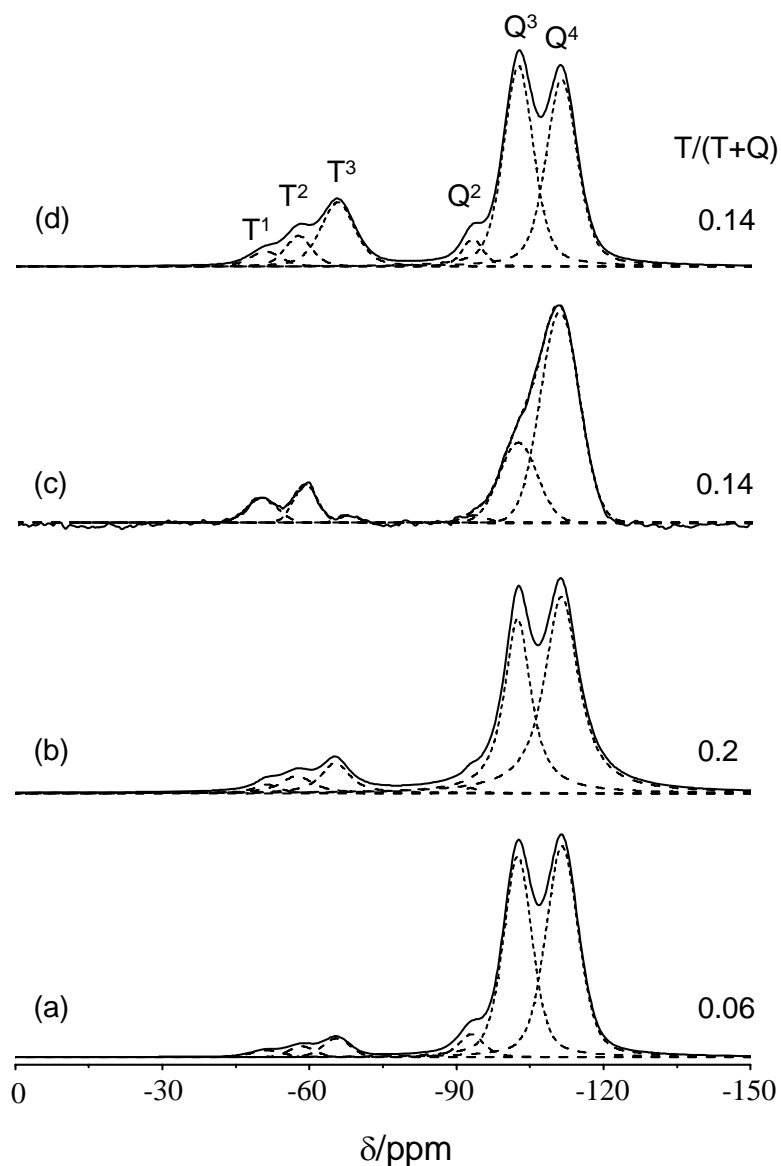

**Fig. S1.**  $^{29}\text{Si}$  MAS NMR spectra of (a) S1-0.06, (b) S1-0.2, (c) M-0.14, and (d) S15-0.14. The dashed lines represent the components used for spectral deconvolution and the T/(T + Q) ratios are indicated in the figure.

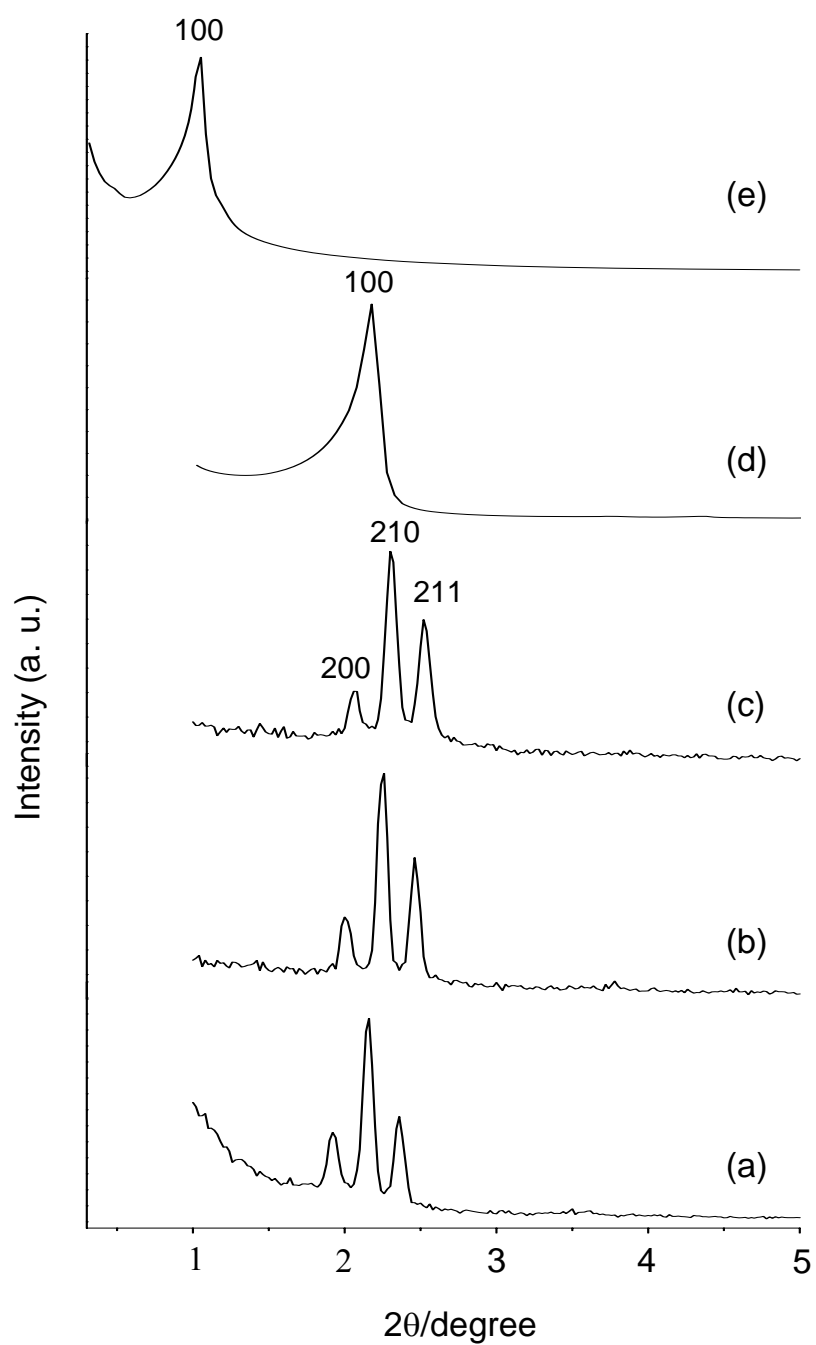

**Fig. S2** Powder XRD patterns of (a) S1-0.06, (b) S1-0.1, (c) S1-0.2, (d) M-0.14, and (e) S15-0.14.

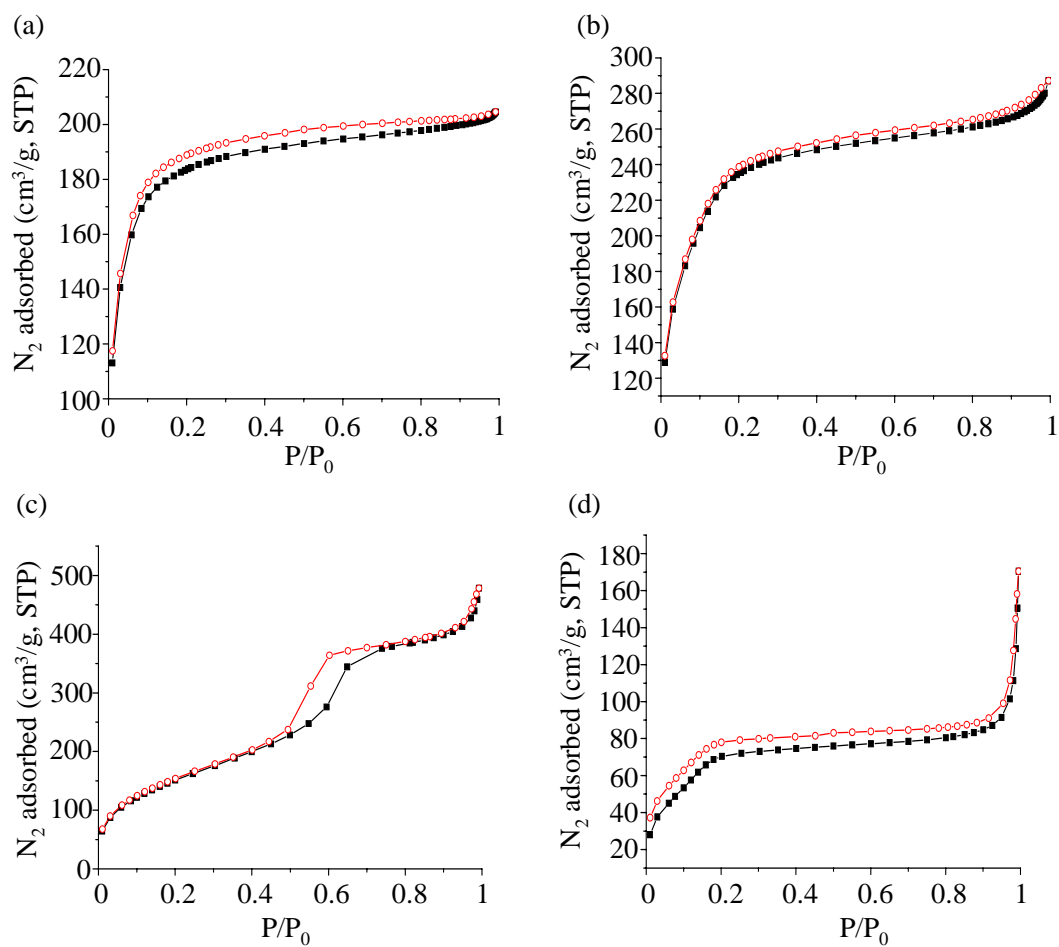

**Fig. S3**  $N_2$  adsorption-desorption isotherms of (a) S1-0.2, (b) S1-0.06, (c) S15-0.14, and (d) M-0.14. The black and red parts represent the adsorption and desorption isotherms, respectively.

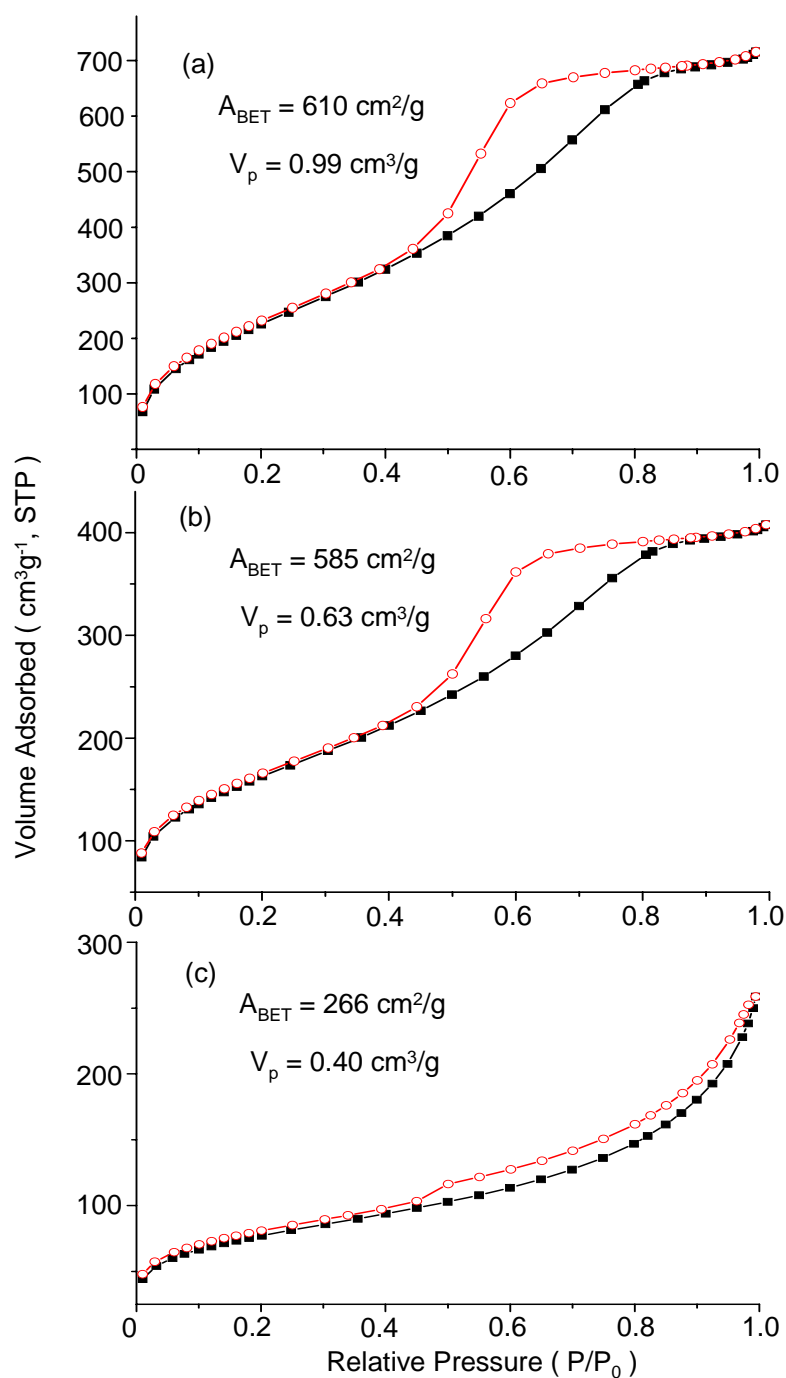

**Fig. S4**  $N_2$  adsorption-desorption isotherms of the  $SiO_2$  samples, prepared with identical experimental conditions of SBA-15 under template-free conditions (i.e., without P123 templating), functionalized with (a) 0, (b) 10, and (c) 20% of thiol groups. The black and red parts represent the adsorption and desorption isotherms, respectively.

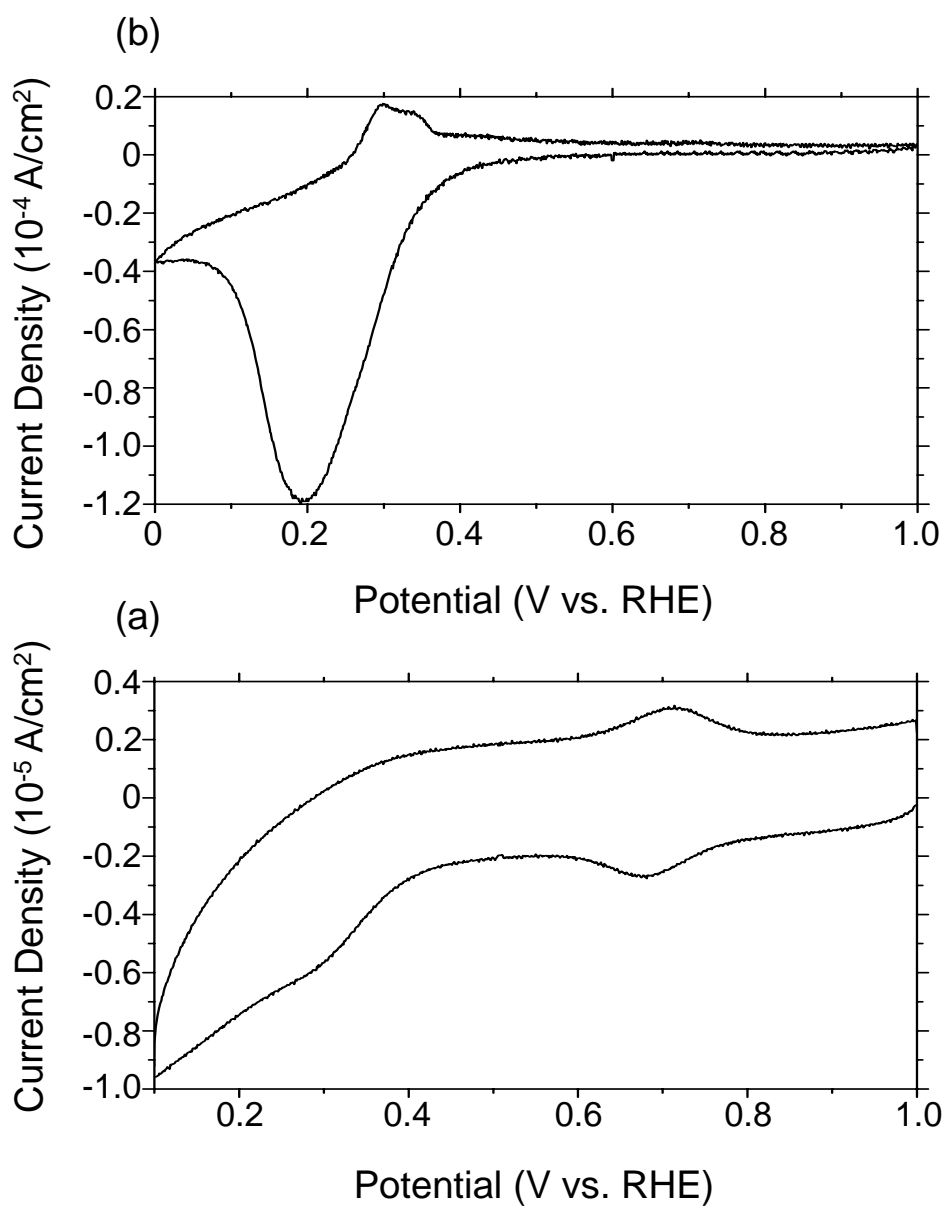

**Fig. S5** Cyclic voltammograms of the S1-0.2 sample after Cu<sup>2+</sup> adsorption of solutions containing (a) 140 and (b) 1000 ppm of Cu<sup>2+</sup> ions.



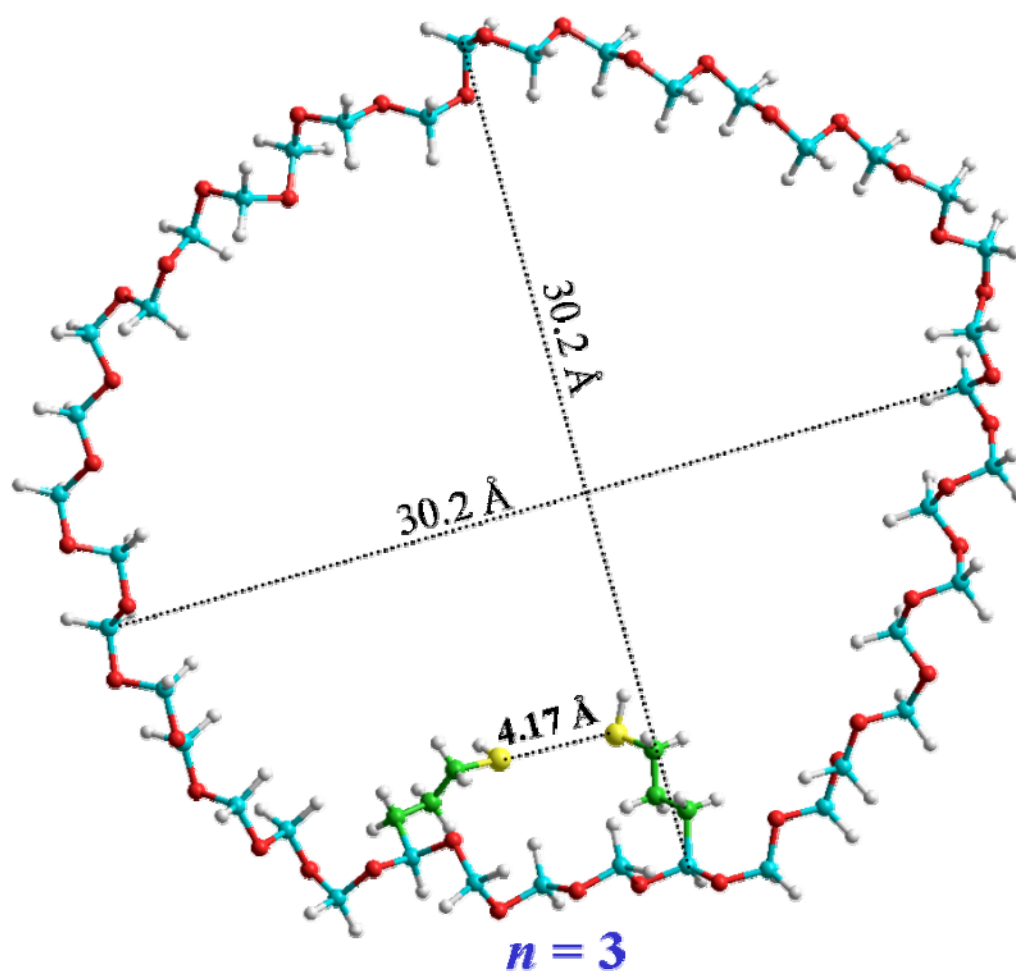

**Fig. S6** The optimized structure of  $T'-(Q')_3-T'-(Q)_{35}$  ( $n = 3$ ) obtained from the MM+ molecular mechanics force field in the suite of HyperChem program. Si: Cyan; C: Green; S: Yellow; O: Red; H: White. The S--S distance is 4.17 Å in this model.

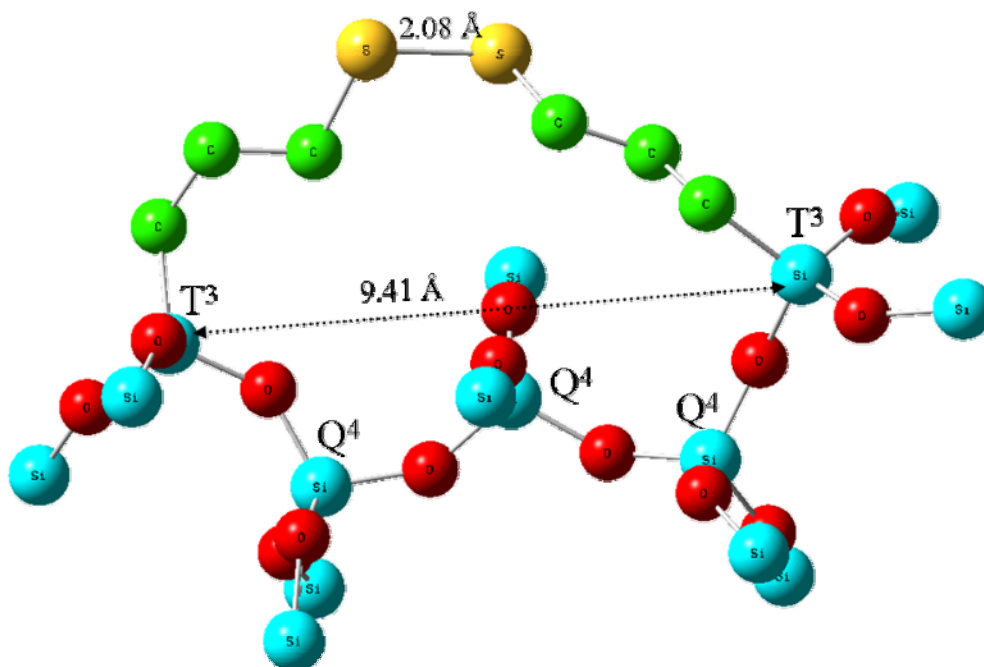

**Fig. S7** The optimized structure of the T<sup>3</sup>-(Q<sup>4</sup>)<sub>3</sub>-T<sup>3</sup> motif obtained from DFT calculations. Si: Cyan; C: Green; O: Red and S: Yellow. The S--S distance is 2.08 Å. The hydrogen atoms are not shown in the figure for clarity.

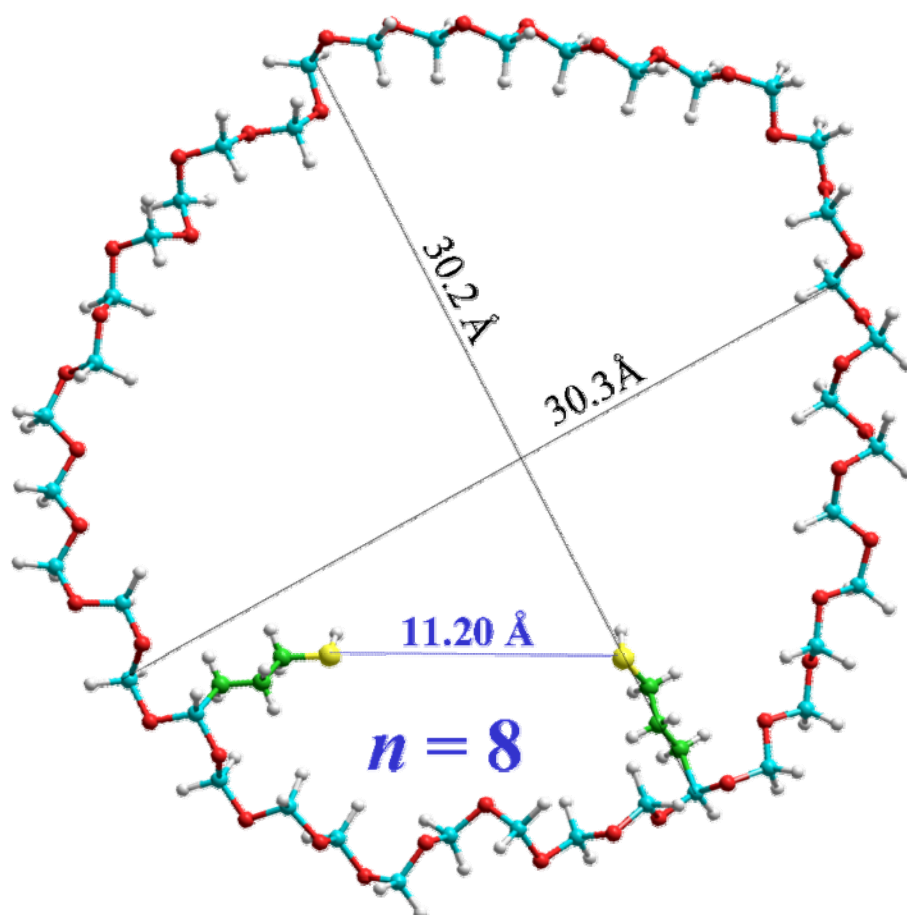

**Fig. S8** The optimized structure of  $T'-(Q')_8-T''-(Q)_{30}$  ( $n = 8$ ) obtained from the MM+ molecular mechanics force field in the suite of HyperChem program. Si: Cyan; C: Green; S: Yellow; O: Red; H: White. The S--S distance is 11.20 Å in this model.
